# Supplementary material for: Nematicidal Volatiles from Bacillus atrophaeus GBSC56 Promote Growth and Stimulate Induced Systemic Resistance in Tomato against Meloidogyne incognita
Source: MDPI journal article supplement (doi:10.3390/ijms22095049), 2021-05-10
Supplement: s1 [file s1]

# Nematicidal Volatiles from *Bacillus atrophaeus* GBSC56 Promote Growth and Stimulate Induced Systemic Resistance in Tomato Against *Meloidogyne incognita*

Muhammad Ayaz <sup>1</sup>, Qurban Ali <sup>1</sup>, Ayaz Farzand <sup>2</sup>, Abdur Rashid Khan <sup>1</sup>, Hongli Ling <sup>3</sup> and Xuewen Gao <sup>1,\*</sup>

<sup>1</sup> Department of Plant Pathology, College of Plant Protection, Nanjing Agricultural University, Key Laboratory of Integrated Management of Crop Diseases and Pests, Ministry of Education, Nanjing 210095, China; m.ayazbiotech@gmail.com (M.A.); qurbanalirattar@webmail.hzau.edu.cn (Q.A.); malix.477@hotmail.com (A.R.K.)

<sup>2</sup> Department of Plant Pathology, University of Agriculture, Faisalabad P.O. Box 38040, Pakistan; ayaz.farzand@uaf.edu.pk

<sup>3</sup> Shandong Vland Biotechnology Co., Ltd, Binzhou, Shandong, 251700, China., linghl@vlandgroup.com

\* Correspondence: gaoxw@njau.edu.cn; Tel: +86-025-8439-5268

**Table S1.** Primers used in the study.

| Gene description                          | Code          | Primers                              | Sequence                                     |
|-------------------------------------------|---------------|--------------------------------------|----------------------------------------------|
| 1-aminocyclopropene-1-Carboxylate Oxidase | <i>ACO1</i>   | <i>ACO1</i> -F<br><i>ACO1</i> -R     | GATCAAGGGACTCCGCGCTC<br>TGGCGCATGGGAGGAACATC |
| cytokinin oxidase/dehydrogenase-like      | <i>SLCKX1</i> | <i>SICKX1</i> -F<br><i>SICKX1</i> -R | AACCTAGGTGGGTGGGGTGG<br>CAACTTCCGCCGCTTTTCCG |
| Auxin synthesis gene                      | <i>SIIAA1</i> | <i>SIIAA1</i> -F<br><i>SIIAA1</i> -R | AAACCCCACCACCTGTTGCC<br>GCAGGGGCAAATTCAGAGCC |
| Expansin synthesis gene                   | <i>exp18</i>  | <i>exp18</i> -F<br><i>exp18</i> -R   | GGTGGAGCGTGTGGGTATGG<br>GGAGGGTTACACCAACCGCC |
| Pathogenesis related protein 1            | <i>PR1</i>    | <i>PR1</i> -F<br><i>PR1</i> -R       | GGTGGCCGACCACAACCTAC<br>GCCGTGCAATTGTGGGTGTC |
| Pathogenesis related protein 5            | <i>PR5</i>    | <i>PR5</i> -F<br><i>PR5</i> -R       | TGGTGGTTTTGGGCTCCACC<br>CATTTTCCCGGCCAGGGTT  |
| Lipoxygenase 1                            | <i>SILOX1</i> | <i>SILOX1</i> -F<br><i>SILOX1</i> -R | CCGCGAACCAACCAAAGCAG<br>ACCAAGGGCCTTCAGGCAAC |
